# Supplementary material for: Persistent Mycobacterium tuberculosis infection in mice requires PerM for successful cell division
Source: eLife journal article supplement (doi:10.7554/elife.49570), 2019-11-21
Supplement: fig3-data1 [file elife-49570-fig3-data1-v1.pdf]

**Figure 3 – Source data 1. Summary statistics of Figure 3C**

|                             | <i>perM</i> -DUC |               |               |               |
|-----------------------------|------------------|---------------|---------------|---------------|
| Time (hours)                | 1.5              | 1.5           | 4             | 10            |
| ( $\mu\text{m}$ )           | <b>No atc</b>    | <b>+ atc</b>  | <b>+ atc</b>  | <b>+ atc</b>  |
| Sample size                 | 291              | 341           | 307           | 319           |
| Minimum                     | 1.897            | 1.991         | 2.412         | 2.311         |
| 25 <sup>th</sup> Percentile | 3.144            | 3.629         | 4.166         | 4.748         |
| Median                      | 3.79             | 4.598         | 5.191         | 6.948         |
| 75 <sup>th</sup> percentile | 4.657            | 5.63          | 6.198         | 10.25         |
| Maximum                     | 9.274            | 11.27         | 14.53         | 23.29         |
| 95% confidence interval     | 3.871 - 4.12     | 4.619 - 4.938 | 5.159 - 5.504 | 7.585 - 8.497 |
