# Supplementary material for: Persistent Mycobacterium tuberculosis infection in mice requires PerM for successful cell division
Source: eLife journal article supplement (doi:10.7554/elife.49570), 2019-11-21
Supplement: fig4-data1 [file elife-49570-fig4-data1-v1.pdf]

**Figure 4 – Source data 1. Summary statistics of Figure 4B**

|                             | <b>empty</b>  |              | <b><i>perM<sub>mtb</sub></i></b> |              | <b><i>perM<sub>msm</sub></i></b> |              | <b><i>ftsB<sub>mtb</sub></i></b> |              | <b><i>ftsB<sub>msm</sub></i></b> |              |
|-----------------------------|---------------|--------------|----------------------------------|--------------|----------------------------------|--------------|----------------------------------|--------------|----------------------------------|--------------|
| <b>(<math>\mu</math>m)</b>  | <b>No atc</b> | <b>+ atc</b> | <b>No atc</b>                    | <b>+ atc</b> | <b>No atc</b>                    | <b>+ atc</b> | <b>No atc</b>                    | <b>+ atc</b> | <b>No atc</b>                    | <b>+ atc</b> |
| Sample size                 | 100           | 100          | 100                              | 100          | 100                              | 100          | 100                              | 100          | 100                              | 100          |
| Minimum                     | 3.066         | 4.206        | 3.064                            | 2.946        | 3.067                            | 2.935        | 4.028                            | 2.797        | 2.726                            | 2.788        |
| 25 <sup>th</sup> Percentile | 4.468         | 8.229        | 4.518                            | 4.381        | 4.595                            | 4.602        | 4.938                            | 4.686        | 4.866                            | 4.719        |
| Median                      | 5.422         | 10.65        | 5.230                            | 5.272        | 5.291                            | 5.156        | 5.466                            | 5.508        | 5.632                            | 5.412        |
| 75 <sup>th</sup> percentile | 6.114         | 13.51        | 5.964                            | 5.839        | 6.385                            | 5.935        | 6.105                            | 6.414        | 6.622                            | 6.422        |
| Maximum                     | 9.263         | 28.73        | 11.31                            | 7.320        | 9.329                            | 8.092        | 8.543                            | 8.599        | 10.61                            | 9.128        |
| 95% confidence interval     | 5.201-5.666   | 10.65-12.53  | 5.078-5.558                      | 4.922-5.340  | 5.280-5.808                      | 5.053-5.427  | 5.390-5.733                      | 5.313-5.787  | 5.573-6.132                      | 5.339-5.875  |
