# Supplementary material for: Persistent Mycobacterium tuberculosis infection in mice requires PerM for successful cell division
Source: eLife. 2019 Nov 21;8:e49570. doi: 10.7554/eLife.49570 (PMC6872210; doi:10.7554/eLife.49570)
Supplement: Table 1—source data 1. [file elife-49570-table1-data1.xlsx]

## Sheet: Table 1 - Source data 1
Table 1 - Source data 1 - Mass spectrometry data of FtsB pulldown in Mtb
			Total Spectrum Count
			Flag Control		Flag - FtsBmtb
#	Identified Proteins (1241)	Molecular Weight	replicate - 1	replicate - 2	replicate - 1	replicate - 2
1	Rv3411c_guaB2	55 kDa	641	363	616	284
2	Rv3003c_ilvB1	66 kDa	270	213	192	184
3	Rv3859c_gltB	166 kDa	147	129	120	126
4	Rv2241_aceE	100 kDa	66	139	39	134
5	Rv0668_rpoC	147 kDa	106	89	108	118
6	Rv2524c_fas	326 kDa	35	158	48	144
7	Rv0667_rpoB	129 kDa	34	59	70	85
8	Rv0802c_Rv0802c	25 kDa	61	55	61	41
9	Rv2783c_gpsI	80 kDa	36	44	51	65
10	Rv0440_groEL2	57 kDa	46	50	61	75
11	Rv2215_dlaT	57 kDa	33	54	32	54
12	Rv1181_pks4	168 kDa	29	83	40	69
13	Rv3800c_pks13	186 kDa	18	79	28	91
14	Rv2940c_mas	224 kDa	19	92	34	81
15	Rv1308_atpA	59 kDa	43	38	57	48
16	Rv3825c_pks2	226 kDa	39	53	39	49
17	Rv1630_rpsA	53 kDa	25	38	39	60
18	Rv3858c_gltD	53 kDa	42	42	35	42
19	Rv0860_fadB	76 kDa	51	51	63	57
20	Rv1310_atpD	53 kDa	32	45	63	52
21	Rv3002c_ilvN	18 kDa	69	35	35	28
22	Rv0350_dnaK	67 kDa	39	48	43	53
23	Rv1248c_Rv1248c	136 kDa	47	40	68	37
24	Cluster of Rv2590_fadD9	127 kDa	19	73	11	77
24.1	Rv2590_fadD9	127 kDa	19	73	11	77
24.2	Rv0101_nrp	269 kDa	1	2	0	2
25	Rv1872c_lldD2	45 kDa	32	29	37	49
26	Rv0006_gyrA	92 kDa	32	35	31	26
27	Rv0685_tuf	44 kDa	35	27	42	27
28	Rv0284_eccC3	145 kDa	24	40	21	35
29	Rv0242c_fabG4	47 kDa	20	26	31	34
30	Rv3240c_secA1	106 kDa	29	26	37	24
31	Rv2839c_infB	94 kDa	22	24	34	29
32	Rv3801c_fadD32	69 kDa	12	53	10	47
33	Rv3417c_groEL1	56 kDa	24	36	24	39
34	Rv1297_rho	65 kDa	22	25	35	31
35	Rv0873_fadE10	71 kDa	15	25	21	38
36	Rv1783_eccC5	153 kDa	23	28	22	32
37	Rv2444c_rne	103 kDa	20	25	22	30
38	Rv1479_moxR1	41 kDa	20	28	39	32
39	Rv3596c_clpC1	94 kDa	15	41	20	33
40	Rv0724_sppA	66 kDa	25	37	17	31
41	Rv3457c_rpoA	38 kDa	22	22	28	28
42	Rv2048c_pks12	432 kDa	22	42	25	31
43	Rv0570_nrdZ	74 kDa	6	36	3	37
44	Rv3646c_topA	102 kDa	29	13	26	16
45	Rv0248c_Rv0248c	71 kDa	15	17	26	20
46	Rv1309_atpG	34 kDa	20	20	33	22
47	Rv3193c_Rv3193c	107 kDa	12	16	23	26
48	Rv0005_gyrB	74 kDa	19	26	22	22
49	Rv2744c_35kd_ag	29 kDa	14	26	23	28
50	Rv0270_fadD2	60 kDa	13	25	19	27
51	Rv2890c_rpsB	31 kDa	15	18	23	22
52	Rv0462_lpdC	49 kDa	18	19	17	23
53	Rv2092c_helY	100 kDa	9	15	19	27
54	Rv1925_fadD31	66 kDa	14	24	13	27
55	Rv2221c_glnE	109 kDa	21	14	28	10
56	Rv0641_rplA	25 kDa	15	19	13	16
57	Rv1488_Rv1488	41 kDa	13	18	21	29
58	Rv1543_Rv1543	37 kDa	14	17	22	29
59	Rv3270_ctpC	76 kDa	16	16	19	29
60	Rv2195_qcrA	47 kDa	12	18	15	30
61	Rv3458c_rpsD	23 kDa	17	17	17	19
62	Rv1017c_prsA	35 kDa	21	19	22	22
63	Rv3138_pflA	40 kDa	15	23	11	18
64	Rv0613c_Rv0613c	93 kDa	16	16	26	13
65	Rv2187_fadD15	64 kDa	14	29	16	23
66	Rv1638_uvrA	106 kDa	14	15	15	17
67	Rv0859_fadA	42 kDa	16	27	24	28
68	Rv3130c_tgs1	51 kDa	0	31	0	32
69	Rv0207c_Rv0207c	26 kDa	36	17	16	10
70	Rv2159c_Rv2159c	36 kDa	13	22	16	22
71	Rv0282_eccA3	68 kDa	2	37	4	28
72	Rv0701_rplC	23 kDa	13	13	14	14
73	Rv2476c_gdh	177 kDa	8	28	8	28
74	Rv3610c_ftsH	82 kDa	15	8	12	34
75	Rv1161_narG	137 kDa	11	14	11	32
76	Rv0511_hemD	59 kDa	17	18	22	9
77	Rv1133c_metE	82 kDa	10	32	8	23
78	Rv3051c_nrdE	79 kDa	1	42	0	36
79	Rv2731_Rv2731	50 kDa	12	17	12	22
80	Rv0147_Rv0147	55 kDa	9	13	17	23
81	Rv1307_atpH	49 kDa	15	15	19	19
82	Rv3285_accA3	64 kDa	11	23	13	32
83	Rv0719_rplF	19 kDa	14	14	14	17
84	Rv0931c_pknD	70 kDa	10	23	13	28
85	Rv2345_Rv2345	70 kDa	9	11	15	22
86	Rv0206c_mmpL3	101 kDa	11	10	18	18
87	Rv0683_rpsG	18 kDa	15	12	14	13
88	Rv0702_rplD	24 kDa	11	12	13	19
89	Rv1683_Rv1683	107 kDa	11	15	18	15
90	Rv0934_pstS1	38 kDa	6	13	18	24
91	Rv2953_Rv2953	45 kDa	14	19	14	16
92	Rv3720_Rv3720	47 kDa	12	12	14	16
93	Rv1821_secA2	89 kDa	4	31	9	24
94	Rv2721c_Rv2721c	72 kDa	12	9	15	17
95	Rv0721_rpsE	23 kDa	14	14	13	11
96	Rv1223_htrA	54 kDa	15	10	15	17
97	Rv2482c_plsB2	88 kDa	11	15	19	15
98	Rv0707_rpsC	30 kDa	12	13	11	15
99	Rv3102c_ftsE	26 kDa	14	13	16	14
100	Rv2200c_ctaC	40 kDa	8	13	13	21
101	Rv2247_accD6	50 kDa	13	23	17	19
102	Rv1206_fadD6	64 kDa	7	15	16	15
103	Rv0684_fusA1	77 kDa	10	18	8	21
104	Rv0131c_fadE1	50 kDa	5	8	13	14
105	Rv0824c_desA1	39 kDa	5	29	4	27
106	Rv3734c_tgs2	49 kDa	8	19	11	20
107	Rv3456c_rplQ	19 kDa	9	11	13	13
108	Rv2097c_pafA	51 kDa	7	15	10	17
109	Serum albumin OS=Bos taurus GN=ALB PE=1 SV=4	69 kDa	6	12	5	5
110	Rv1423_whiA	35 kDa	12	15	14	8
111	Rv1731_gabD2	55 kDa	8	10	9	19
112	Rv2289_cdh	29 kDa	13	11	14	15
113	Rv2996c_serA1	55 kDa	8	23	8	24
114	Rv1175c_fadH	73 kDa	11	7	9	9
115	Rv0651_rplJ	18 kDa	8	8	16	11
116	Rv3868_eccA1	62 kDa	4	21	5	21
117	Rv1547_dnaE1	129 kDa	8	7	28	6
118	Rv2226_Rv2226	56 kDa	6	12	9	12
119	Rv2703_sigA	58 kDa	12	10	13	13
120	Rv2752c_Rv2752c	59 kDa	5	9	9	12
121	Rv2951c_Rv2951c	41 kDa	8	7	10	18
122	Rv1593c_Rv1593c	26 kDa	9	14	10	10
123	Rv0155_pntAa	38 kDa	7	9	26	11
124	Rv0338c_Rv0338c	95 kDa	5	10	10	17
125	Rv1770_Rv1770	46 kDa	4	10	13	18
126	Rv3273_Rv3273	81 kDa	10	9	10	18
127	Rv0655_mkl	39 kDa	4	18	6	13
128	Rv0994_moeA1	44 kDa	9	11	12	15
129	Rv2909c_rpsP	17 kDa	10	12	9	13
130	Rv2922c_smc	131 kDa	9	19	12	17
131	Rv3479_Rv3479	109 kDa	3	13	9	18
132	Rv0283_eccB3	56 kDa	7	15	7	13
133	Rv3692_moxR2	38 kDa	11	9	24	11
134	Rv0831c_Rv0831c	30 kDa	8	18	9	13
135	Rv2118c_Rv2118c	30 kDa	3	10	10	16
136	Rv0809_purM	38 kDa	8	10	16	8
137	Rv3721c_dnaZX	62 kDa	12	16	12	10
138	Rv3140_fadE23	43 kDa	6	13	7	19
139	Rv3139_fadE24	50 kDa	5	14	7	16
140	Rv0183_Rv0183	30 kDa	13	5	13	7
141	Rv2766c_Rv2766c	27 kDa	7	6	10	16
142	Rv3917c_parB	37 kDa	12	13	16	9
143	Rv1194c_Rv1194c	46 kDa	7	12	11	7
144	Rv2030c_Rv2030c	75 kDa	0	26	0	19
145	Rv2935_ppsE	159 kDa	2	25	7	20
146	Rv0243_fadA2	46 kDa	5	9	14	10
147	Rv0247c_Rv0247c	29 kDa	5	7	12	13
148	Rv0718_rpsH	14 kDa	5	8	9	10
149	Rv0410c_pknG	82 kDa	5	16	10	12
150	Rv0479c_Rv0479c	37 kDa	3	10	12	14
151	Rv3151_nuoG	85 kDa	7	2	26	7
152	Rv1771_Rv1771	48 kDa	7	8	10	13
153	Rv1782_eccB5	54 kDa	12	9	6	11
154	Rv2213_pepB	53 kDa	8	10	12	10
155	Rv3088_tgs4	51 kDa	9	8	10	11
156	Rv0352_dnaJ1	41 kDa	8	11	8	9
157	Rv1751_Rv1751	50 kDa	8	12	9	13
158	Cluster of Rv0469_umaA	33 kDa	3	20	1	16
158.1	Rv0469_umaA	33 kDa	3	20	1	16
158.2	Rv0645c_mmaA1	33 kDa	0	1	0	1
159	Rv2563_Rv2563	36 kDa	8	12	12	15
160	Rv2627c_Rv2627c	46 kDa	0	15	0	24
161	Rv3910_Rv3910	124 kDa	7	13	9	16
162	Rv0383c_Rv0383c	32 kDa	6	6	10	17
163	Rv2296_Rv2296	33 kDa	7	9	13	13
164	Cluster of Rv0470c_pcaA	33 kDa	4	20	3	18
164.1	Rv0470c_pcaA	33 kDa	3	19	2	17
164.2	Rv3392c_cmaA1	32 kDa	1	7	1	5
165	Rv0241c_htdX	30 kDa	8	8	12	11
166	Rv2004c_Rv2004c	54 kDa	0	28	0	20
167	Rv2582_ppiB	32 kDa	4	5	10	20
168	Rv3131_Rv3131	36 kDa	0	22	0	18
169	Rv3198c_uvrD2	76 kDa	30	2	5	0
170	Rv3206c_moeB1	42 kDa	7	13	11	9
171	Rv1544_Rv1544	28 kDa	8	12	12	11
172	Rv3460c_rpsM	14 kDa	8	7	10	11
173	Rv2969c_Rv2969c	27 kDa	2	9	10	18
174	Rv0704_rplB	31 kDa	5	5	7	7
175	Rv2299c_htpG	73 kDa	3	18	3	19
176	Rv2495c_bkdC	41 kDa	5	9	7	8
177	Rv3443c_rplM	16 kDa	9	8	7	8
178	Rv3920c_Rv3920c	21 kDa	1	8	9	11
179	Rv0432_sodC	24 kDa	3	6	5	15
180	Rv2587c_secD	60 kDa	5	6	10	18
181	Rv0347_Rv0347	37 kDa	11	7	13	5
182	Rv0357c_purA	47 kDa	12	7	11	8
183	Rv2586c_secF	47 kDa	3	4	11	20
184	Rv1480_Rv1480	34 kDa	6	8	10	6
185	Rv2245_kasA	43 kDa	3	18	1	14
186	Rv3584_lpqE	19 kDa	8	8	11	10
187	Rv3907c_pcnA	53 kDa	12	3	16	5
188	Rv0088_Rv0088	25 kDa	7	8	9	10
189	Rv0524_hemL	48 kDa	6	13	9	10
190	Rv0940c_Rv0940c	32 kDa	8	2	15	8
191	Rv1179c_Rv1179c	101 kDa	4	7	11	9
192	Rv1391_dfp	44 kDa	8	8	14	13
193	Rv1908c_katG	81 kDa	3	23	4	15
194	Rv2196_qcrB	61 kDa	7	5	7	8
195	Rv2214c_ephD	64 kDa	1	6	8	13
196	Rv2439c_proB	39 kDa	10	3	8	3
197	Rv3148_nuoD	48 kDa	4	5	16	8
198	Rv1691_Rv1691	27 kDa	5	6	11	10
199	Rv2416c_eis	44 kDa	5	4	6	9
200	Rv2564_glnQ	35 kDa	5	9	7	10
201	Rv2031c_hspX	16 kDa	1	10	0	17
202	Rv0644c_mmaA2	33 kDa	1	19	2	15
203	Rv2284_lipM	47 kDa	0	7	6	17
204	Rv2737c_recA	85 kDa	7	7	9	8
205	Rv2992c_gltS	54 kDa	8	4	21	7
206	Rv2584c_apt	23 kDa	8	9	8	6
207	Rv3616c_espA	40 kDa	5	7	10	11
208	Rv0178_Rv0178	26 kDa	3	8	10	12
209	Rv0530_Rv0530	43 kDa	3	8	7	8
210	Rv0647c_Rv0647c	55 kDa	4	11	3	9
211	Rv0723_rplO	16 kDa	2	8	3	6
212	Rv1641_infC	22 kDa	3	5	3	5
213	Rv2357c_glyS	53 kDa	2	4	10	11
214	Rv2583c_relA	87 kDa	12	9	10	1
215	Rv1180_pks3	51 kDa	4	14	7	12
216	Rv2115c_mpa	67 kDa	2	14	2	9
217	Rv2326c_Rv2326c	73 kDa	5	4	6	14
218	Rv3442c_rpsI	16 kDa	3	5	8	4
219	Cluster of Rv1024_Rv1024	25 kDa	0	0	18	30
219.1	Rv1024_Rv1024	25 kDa	0	0	18	30
219.2	Rv1024_Flag	26 kDa	0	0	0	30
220	Rv0180c_Rv0180c	48 kDa	6	5	9	7
221	Rv1611_trpC	28 kDa	5	12	6	9
222	Rv1780_Rv1780	20 kDa	3	13	4	3
223	Rv2455c_Rv2455c	69 kDa	3	15	1	15
224	Rv0148_Rv0148	30 kDa	4	16	3	11
225	Rv1218c_Rv1218c	33 kDa	4	6	7	12
226	Rv3528c_Rv3528c	27 kDa	5	4	4	4
227	Rv3623_lpqG	25 kDa	5	6	8	12
228	Rv1623c_cydA	54 kDa	5	4	8	9
229	Rv3090_Rv3090	32 kDa	3	9	7	11
230	Rv3870_eccCa1	81 kDa	7	7	6	9
231	Rv0056_rplI	16 kDa	5	5	7	6
232	Rv1392_metK	43 kDa	3	12	3	10
233	Rv2629_Rv2629	41 kDa	0	22	0	15
234	Rv2904c_rplS	13 kDa	4	6	7	5
235	Rv2952_Rv2952	31 kDa	5	7	8	7
236	Rv3676_crp	25 kDa	1	13	4	10
237	Rv0392c_ndhA	50 kDa	3	4	13	12
238	Rv0757_phoP	28 kDa	4	14	5	9
239	Rv1711_Rv1711	28 kDa	6	5	7	5
240	Rv2224c_caeA	56 kDa	5	5	4	11
241	Rv2246_kasB	46 kDa	2	16	1	11
242	Rv2457c_clpX	47 kDa	7	10	7	7
243	Rv3001c_ilvC	36 kDa	2	10	4	11
244	Rv3248c_sahH	54 kDa	4	5	8	5
245	Rv0580c_Rv0580c	18 kDa	2	8	7	4
246	Rv1265_Rv1265	25 kDa	7	7	6	6
247	Rv1294_thrA	46 kDa	6	10	7	11
248	Rv2298_Rv2298	35 kDa	5	5	6	8
249	Rv3436c_glmS	68 kDa	7	10	8	6
250	Rv0014c_pknB	67 kDa	5	6	6	9
251	Rv0157_pntB	49 kDa	5	4	7	11
252	Rv1074c_fadA3	43 kDa	0	20	0	20
253	Rv1094_desA2	31 kDa	0	14	4	14
254	Rv1643_rplT	15 kDa	3	5	2	6
255	Rv2509_Rv2509	28 kDa	6	12	0	6
256	Rv3132c_devS	62 kDa	0	16	0	16
257	Rv1020_mfd	133 kDa	3	8	8	2
258	Rv1078_pra	25 kDa	6	6	7	7
259	Rv2842c_Rv2842c	20 kDa	8	6	8	8
260	Rv3682_ponA2	85 kDa	1	3	6	16
261	Rv3726_Rv3726	42 kDa	4	4	9	12
262	Cluster of Rv2931_ppsA	199 kDa	6	43	0	0
262.1	Rv2931_ppsA	199 kDa	6	35	0	0
262.2	Rv2932_ppsB	162 kDa	0	13	0	0
262.3	Rv2933_ppsC	231 kDa	0	1	0	0
263	Rv0475_hbhA	22 kDa	5	4	8	9
264	Rv1013_pks16	58 kDa	0	21	1	7
265	Rv1747_Rv1747	92 kDa	3	6	7	9
266	Rv3246c_mtrA	25 kDa	1	13	1	8
267	Rv0871_cspB	15 kDa	2	5	8	6
268	Rv0896_gltA2	48 kDa	10	6	6	4
269	Rv1795_eccD5	53 kDa	8	5	6	6
270	Rv2689c_Rv2689c	43 kDa	3	4	5	7
271	Rv0227c_Rv0227c	46 kDa	3	3	4	11
272	Rv0290_eccD3	48 kDa	5	5	4	5
273	Rv0412c_Rv0412c	47 kDa	3	8	3	13
274	Rv0418_lpqL	52 kDa	2	2	8	10
275	Rv0705_rpsS	11 kDa	2	3	6	7
276	Rv1015c_rplY	22 kDa	7	7	4	7
277	Rv1388_mihF	21 kDa	7	6	10	5
278	Rv2380c_mbtE	183 kDa	0	22	0	17
279	Rv2916c_ffh	55 kDa	7	4	13	5
280	Rv3311_Rv3311	46 kDa	3	5	4	8
281	Rv3876_espI	71 kDa	2	9	4	7
282	Rv0640_rplK	15 kDa	3	3	5	4
283	Rv1279_Rv1279	57 kDa	5	1	9	8
284	Rv1797_eccE5	44 kDa	6	6	5	9
285	Rv2793c_truB	32 kDa	2	4	8	5
286	Rv0384c_clpB	93 kDa	7	8	5	6
287	Rv0902c_prrB	48 kDa	1	4	4	12
288	Rv1769_Rv1769	45 kDa	6	5	5	4
289	Rv2051c_ppm1	94 kDa	4	8	6	6
290	Rv3794_embA	116 kDa	2	3	6	6
291	Rv3808c_glfT2	72 kDa	1	4	5	11
292	Rv3879c_espK	74 kDa	1	13	2	8
293	Rv0472c_Rv0472c	26 kDa	7	1	10	1
294	Rv0652_rplL	13 kDa	3	4	6	5
295	Rv0714_rplN	13 kDa	3	4	5	2
296	Rv0753c_mmsA	54 kDa	0	14	0	11
297	Rv1092c_coaA	36 kDa	4	2	10	3
298	Rv1162_narH	62 kDa	2	5	6	13
299	Rv1689_tyrS	46 kDa	10	0	13	1
300	Rv1794_Rv1794	32 kDa	1	15	2	9
301	Rv2529_Rv2529	50 kDa	6	4	7	6
302	Rv2888c_amiC	51 kDa	6	6	5	7
303	Rv3674c_nth	27 kDa	2	2	4	8
304	Rv3680_Rv3680	41 kDa	2	9	5	6
305	Rv0439c_Rv0439c	34 kDa	2	11	4	11
306	Rv1232c_Rv1232c	47 kDa	5	3	9	4
307	Rv1708_Rv1708	34 kDa	6	9	4	4
308	Rv2074_Rv2074	15 kDa	5	2	7	2
309	Rv2625c_Rv2625c	41 kDa	0	9	0	11
310	Rv2984_ppk1	83 kDa	11	4	9	3
311	Rv0001_dnaA	57 kDa	6	4	6	7
312	Rv1191_Rv1191	33 kDa	0	15	3	9
313	Rv1229c_mrp	41 kDa	3	12	5	6
314	Rv1871c_Rv1871c	15 kDa	7	5	8	3
315	Rv2970c_lipN	40 kDa	3	5	5	9
316	Rv3211_rhlE	57 kDa	5	2	5	4
317	Rv3671c_Rv3671c	41 kDa	7	3	10	9
318	Rv0706_rplV	20 kDa	4	4	3	6
319	Rv0785_Rv0785	61 kDa	6	3	4	3
320	Rv0821c_phoY2	24 kDa	0	16	0	5
321	Rv1003_Rv1003	30 kDa	2	1	8	4
322	Rv1698_mctB	32 kDa	0	1	6	8
323	Rv2219_Rv2219	27 kDa	3	2	4	12
324	Rv2713_sthA	51 kDa	6	11	4	3
325	Rv3127_Rv3127	38 kDa	0	16	0	10
326	Rv3441c_mrsA	46 kDa	1	18	4	8
327	Rv3921c_Rv3921c	41 kDa	2	2	4	9
328	Rv0632c_echA3	24 kDa	5	1	14	0
329	Rv0716_rplE	21 kDa	4	5	7	5
330	Rv0933_pstB	30 kDa	2	4	8	9
331	Rv1281c_oppD	65 kDa	0	2	7	15
332	Rv1360_Rv1360	37 kDa	6	1	9	6
333	Rv2158c_murE	55 kDa	1	14	7	9
334	Rv2553c_Rv2553c	45 kDa	2	0	5	13
335	Rv2985_mutT1	35 kDa	5	6	5	7
336	Rv3679_Rv3679	36 kDa	5	7	5	6
337	Rv0048c_Rv0048c	31 kDa	1	4	6	8
338	Rv0444c_rskA	24 kDa	3	3	5	11
339	Rv0949_uvrD1	85 kDa	4	11	9	3
340	Rv1397c_vapC10	15 kDa	4	3	3	2
341	Rv1402_priA	70 kDa	4	4	5	7
342	Rv2032_acg	37 kDa	0	10	0	8
343	Rv2101_helZ	112 kDa	9	4	5	0
344	Rv2528c_mrr	34 kDa	5	6	7	9
345	Rv2531c_Rv2531c	106 kDa	3	8	7	6
346	Rv2785c_rpsO	10 kDa	6	4	6	4
347	Rv2921c_ftsY	44 kDa	0	6	6	8
348	Rv3205c_Rv3205c	31 kDa	3	5	4	6
349	Rv3775_lipE	45 kDa	4	2	6	7
350	Rv3888c_Rv3888c	38 kDa	5	4	4	8
351	Rv0732_secY	48 kDa	2	1	6	5
352	Rv0825c_Rv0825c	23 kDa	6	6	6	4
353	Rv1006_Rv1006	61 kDa	0	5	7	7
354	Rv1106c_Rv1106c	41 kDa	4	8	3	7
355	Rv1267c_embR	42 kDa	0	17	0	6
356	Rv1311_atpC	13 kDa	5	3	6	4
357	Rv1568_bioA	46 kDa	4	4	9	1
358	Rv2005c_Rv2005c	31 kDa	1	9	1	9
359	Rv2150c_ftsZ	39 kDa	1	9	5	5
360	Rv2565_Rv2565	62 kDa	3	6	3	5
361	Rv2681_Rv2681	47 kDa	3	2	4	8
362	Rv3390_lpqD	25 kDa	3	6	6	7
363	Rv0818_Rv0818	28 kDa	5	6	3	5
364	Rv1697_Rv1697	42 kDa	0	0	10	4
365	Rv1836c_Rv1836c	70 kDa	2	3	6	6
366	Rv2942_mmpL7	95 kDa	2	2	1	14
367	Rv3099c_Rv3099c	30 kDa	1	12	2	8
368	Rv3200c_Rv3200c	38 kDa	3	2	6	8
369	Rv3318_sdhA	65 kDa	2	2	8	8
370	Rv0670_end	27 kDa	3	5	3	7
371	Rv0703_rplW	11 kDa	3	3	4	1
372	Rv0815c_cysA2	31 kDa	3	5	2	8
373	Rv1023_eno	45 kDa	1	5	2	8
374	Rv1239c_corA	41 kDa	3	2	5	8
375	Rv1658_argG	44 kDa	0	13	1	12
376	Rv1919c_Rv1919c	17 kDa	3	4	4	3
377	Rv2203_Rv2203	24 kDa	2	3	6	7
378	Rv2204c_Rv2204c	13 kDa	1	7	4	8
379	Rv2361c_Rv2361c	34 kDa	2	3	3	4
380	Rv2373c_dnaJ2	40 kDa	1	6	3	6
381	Rv2461c_clpP1	22 kDa	3	9	3	6
382	Rv2986c_hupB	22 kDa	3	3	3	1
383	Rv3194c_Rv3194c	35 kDa	2	4	7	6
384	Rv3709c_ask	44 kDa	1	15	3	10
385	Rv3791_dprE2	27 kDa	1	5	4	6
386	Cluster of Rv2941_fadD28	63 kDa	3	7	4	8
386.1	Rv2941_fadD28	63 kDa	3	6	4	6
386.2	Rv1521_fadD25	63 kDa	0	3	0	4
386.3	Rv3826_fadD23	63 kDa	0	1	0	1
387	Rv0445c_sigK	21 kDa	2	2	6	9
388	Rv0710_rpsQ	15 kDa	4	2	3	4
389	Rv1270c_lprA	25 kDa	4	6	5	6
390	Rv2153c_murG	42 kDa	3	4	5	4
391	Rv2374c_hrcA	36 kDa	3	10	2	3
392	Rv2442c_rplU	11 kDa	4	2	5	3
393	Rv2751_Rv2751	34 kDa	3	6	8	5
394	Rv3241c_Rv3241c	25 kDa	4	4	5	4
395	Rv3438_Rv3438	29 kDa	4	4	5	7
396	Rv0066c_icd2	83 kDa	2	7	3	11
397	Rv1238_sugC	43 kDa	0	3	10	7
398	Rv1280c_oppA	63 kDa	1	0	6	10
399	Rv1286_cysN	68 kDa	3	9	3	4
400	Rv1508c_Rv1508c	64 kDa	4	5	6	6
401	Rv1621c_cydD	55 kDa	2	5	4	8
402	Rv2151c_ftsQ	34 kDa	1	1	4	11
403	Rv2928_tesA	29 kDa	2	8	1	5
404	Rv3763_lpqH	15 kDa	2	6	6	6
405	Rv0079_Rv0079	29 kDa	0	11	0	7
406	Rv1368_lprF	27 kDa	3	5	7	7
407	Rv0173_lprK	42 kDa	4	4	5	7
408	Rv0932c_pstS2	38 kDa	5	3	6	4
409	Rv0969_ctpV	80 kDa	0	4	1	11
410	Rv1687c_Rv1687c	28 kDa	1	1	14	6
411	Rv2220_glnA1	54 kDa	5	6	6	6
412	Rv2343c_dnaG	70 kDa	6	4	7	2
413	Rv3795_embB	118 kDa	1	2	4	6
414	Rv3816c_Rv3816c	28 kDa	4	7	3	6
415	Rv3871_eccCb1	65 kDa	2	7	5	7
416	Rv0466_Rv0466	30 kDa	1	9	1	5
417	Rv0686_Rv0686	29 kDa	1	4	4	7
418	Rv0798c_cfp29	29 kDa	2	5	2	8
419	Rv1215c_Rv1215c	63 kDa	1	0	3	6
420	Rv1507c_Rv1507c	27 kDa	2	2	10	3
421	Rv1640c_lysX	128 kDa	0	0	2	12
422	Rv1820_ilvG	58 kDa	3	7	4	6
423	Rv2383c_mbtB	152 kDa	0	13	0	9
424	Rv2483c_plsC	62 kDa	4	5	6	6
425	Rv2903c_lepB	32 kDa	3	3	5	8
426	Rv2967c_pca	120 kDa	1	10	2	6
427	Rv3042c_serB2	43 kDa	3	4	3	3
428	Rv3091_Rv3091	62 kDa	2	1	6	9
429	Rv3213c_Rv3213c	29 kDa	4	5	4	3
430	Rv3683_Rv3683	34 kDa	2	2	4	9
431	Rv3719_Rv3719	53 kDa	2	5	4	6
432	Rv3908_mutT4	27 kDa	1	3	0	5
433	Rv0054_ssb	17 kDa	6	5	3	3
434	Rv0072_Rv0072	36 kDa	0	2	7	7
435	Rv0638_secE1	17 kDa	3	0	4	7
436	Rv0708_rplP	16 kDa	4	3	4	4
437	Rv1594_nadA	37 kDa	8	5	5	4
438	Rv1703c_Rv1703c	22 kDa	2	6	4	7
439	Rv2194_qcrC	29 kDa	2	3	2	5
440	Rv3043c_ctaD	64 kDa	3	2	3	8
441	Rv3319_sdhB	29 kDa	2	4	6	5
442	Rv3519_Rv3519	26 kDa	4	1	6	5
443	Rv3778c_Rv3778c	42 kDa	3	9	4	7
444	Rv0176_Rv0176	35 kDa	0	4	4	9
445	Rv0464c_Rv0464c	21 kDa	2	3	8	3
446	Rv1483_fabG1	26 kDa	2	8	4	7
447	Rv1629_polA	98 kDa	0	11	0	7
448	Rv1880c_cyp140	49 kDa	2	5	6	3
449	Rv1996_Rv1996	34 kDa	0	10	0	10
450	Rv2165c_Rv2165c	42 kDa	3	3	4	2
451	Rv2305_Rv2305	46 kDa	3	5	4	3
452	Rv3299c_atsB	106 kDa	2	0	7	4
453	Rv3302c_glpD2	63 kDa	4	1	5	6
454	Rv3515c_fadD19	60 kDa	0	15	0	14
455	Rv3667_acs	71 kDa	3	4	5	4
456	Rv3909_Rv3909	84 kDa	2	2	3	11
457	Rv0015c_pknA	46 kDa	2	3	4	7
458	Rv0877_Rv0877	27 kDa	0	4	2	5
459	Rv0981_mprA	26 kDa	2	8	0	4
460	Rv1620c_cydC	59 kDa	1	4	7	9
461	Rv1779c_Rv1779c	64 kDa	1	9	1	5
462	Rv1819c_bacA	71 kDa	2	1	5	4
463	Rv1997_ctpF	95 kDa	0	3	0	14
464	Rv2454c_Rv2454c	40 kDa	1	10	3	7
465	Rv2460c_clpP2	24 kDa	2	8	3	5
466	Rv2748c_ftsK	94 kDa	0	0	7	4
467	Rv2945c_lppX	24 kDa	2	5	4	7
468	Rv3490_otsA	56 kDa	5	4	5	5
469	Rv0120c_fusA2	76 kDa	0	11	1	14
470	Rv1306_atpF	18 kDa	2	3	1	3
471	Rv1699_pyrG	64 kDa	1	2	1	6
472	Rv1743_pknE	61 kDa	2	5	5	7
473	Rv1825_Rv1825	31 kDa	3	4	4	7
474	Rv2002_fabG3	27 kDa	2	7	4	6
475	Rv2091c_Rv2091c	26 kDa	3	3	4	4
476	Rv2555c_alaS	97 kDa	0	9	1	7
477	Rv2868c_gcpE	40 kDa	1	5	2	4
478	Rv3058c_Rv3058c	24 kDa	4	3	3	3
479	Rv3569c_hsaD	32 kDa	3	4	9	6
480	Rv0292_eccE3	36 kDa	5	6	2	6
481	Rv0501_galE2	41 kDa	3	4	6	4
482	Rv0547c_Rv0547c	32 kDa	4	2	2	5
483	Rv0562_grcC1	36 kDa	0	11	1	3
484	Rv1192_Rv1192	30 kDa	2	3	5	6
485	Rv1234_Rv1234	19 kDa	2	4	5	5
486	Rv1798_eccA5	68 kDa	0	8	1	5
487	Rv1876_bfrA	18 kDa	4	1	6	0
488	Rv1978_Rv1978	31 kDa	0	3	0	7
489	Rv2129c_Rv2129c	31 kDa	4	3	5	6
490	Rv2475c_Rv2475c	16 kDa	4	3	6	2
491	Rv3038c_Rv3038c	36 kDa	3	3	6	1
492	Rv3133c_devR	23 kDa	0	10	0	8
493	Rv3134c_Rv3134c	28 kDa	0	9	0	8
494	Rv3306c_amiB1	41 kDa	4	3	3	2
495	Rv0237_lpqI	40 kDa	2	2	5	3
496	Rv0643c_mmaA3	33 kDa	2	5	1	5
497	Rv0823c_Rv0823c	41 kDa	2	9	2	2
498	Rv0983_pepD	46 kDa	0	7	6	4
499	Rv2054_Rv2054	25 kDa	2	3	4	5
500	Rv2068c_blaC	33 kDa	2	2	6	6
501	Rv2131c_cysQ	28 kDa	1	9	3	5
502	Rv2447c_folC	51 kDa	1	7	0	8
503	Rv2449c_Rv2449c	44 kDa	1	2	5	7
504	Rv3774_echA21	29 kDa	3	6	4	4
505	Rv1829_Rv1829	18 kDa	3	2	6	4
506	Rv1957_Rv1957	20 kDa	2	2	3	2
507	Rv3661_Rv3661	31 kDa	0	3	6	7
508	Rv3693_Rv3693	48 kDa	2	2	2	6
509	Rv3854c_ethA	55 kDa	0	9	0	7
510	Rv3869_eccB1	51 kDa	1	2	5	5
511	Rv0047c_Rv0047c	20 kDa	3	3	2	3
512	Rv0068_Rv0068	32 kDa	1	7	6	5
513	Rv0642c_mmaA4	35 kDa	3	9	2	4
514	Rv0899_ompA	34 kDa	0	2	4	8
515	Rv1340_rphA	27 kDa	3	1	9	3
516	Rv2178c_aroG	51 kDa	1	10	1	7
517	Rv2198c_mmpS3	31 kDa	1	3	2	7
518	Rv2363_amiA2	51 kDa	5	2	8	1
519	Rv2593c_ruvA	20 kDa	4	2	7	0
520	Rv2901c_Rv2901c	12 kDa	0	0	9	7
521	Rv2954c_Rv2954c	27 kDa	3	3	5	4
522	Rv2989_Rv2989	24 kDa	5	4	5	0
523	Rv3256c_Rv3256c	35 kDa	3	4	5	4
524	Rv3575c_Rv3575c	38 kDa	1	6	1	7
525	Rv3894c_eccC2	154 kDa	3	2	0	6
526	Rv0170_mce1B	38 kDa	5	4	3	3
527	Rv0317c_glpQ2	28 kDa	5	5	5	2
528	Rv0903c_prrA	25 kDa	1	7	0	6
529	Rv1101c_Rv1101c	42 kDa	4	2	4	4
530	Rv1513_Rv1513	27 kDa	0	2	4	3
531	Rv1536_ileS	117 kDa	5	1	2	1
532	Rv2338c_moeW	35 kDa	2	3	3	5
533	Rv2567_Rv2567	95 kDa	0	7	0	5
534	Rv3212_Rv3212	43 kDa	0	1	4	5
535	Rv0016c_pbpA	52 kDa	1	2	4	7
536	Rv0055_rpsR1	10 kDa	2	2	2	1
537	Rv0291_mycP3	46 kDa	3	2	4	5
538	Rv0467_icl1	47 kDa	0	11	0	12
539	Rv0509_hemA	49 kDa	0	7	1	3
540	Rv1173_fbiC	92 kDa	3	7	5	1
541	Rv1380_pyrB	34 kDa	4	5	3	3
542	Rv1614_lgt	50 kDa	4	1	2	5
543	Rv2218_lipA	35 kDa	0	7	0	6
544	Rv2420c_Rv2420c	14 kDa	1	2	1	1
545	Rv2623_TB31.7	32 kDa	0	7	0	5
546	Rv3044_fecB	37 kDa	1	3	2	5
547	Rv3101c_ftsX	33 kDa	0	3	3	6
548	Rv3147_nuoC	27 kDa	3	3	7	3
549	Rv3498c_mce4B	37 kDa	1	2	3	5
550	Rv3587c_Rv3587c	27 kDa	2	0	5	4
551	Rv3627c_Rv3627c	47 kDa	1	4	5	4
552	Rv3793_embC	117 kDa	2	1	3	4
553	Rv0715_rplX	11 kDa	3	4	3	5
554	Rv0036c_Rv0036c	28 kDa	0	10	0	3
555	Rv0437c_psd	24 kDa	0	1	3	6
556	Rv0734_mapA	27 kDa	1	5	4	3
557	Rv0861c_ercc3	60 kDa	2	5	9	3
558	Rv1540_Rv1540	33 kDa	1	3	4	2
559	Rv2244_acpM	12 kDa	3	5	2	4
560	Rv2802c_Rv2802c	39 kDa	3	0	4	0
561	Rv2818c_Rv2818c	43 kDa	6	1	5	2
562	Rv2869c_rip	43 kDa	2	2	3	7
563	Rv2936_drrA	36 kDa	2	3	2	4
564	Rv2955c_Rv2955c	36 kDa	1	2	2	4
565	Rv3006_lppZ	39 kDa	1	1	2	7
566	Rv3296_lhr	161 kDa	0	2	1	3
567	Rv0060_Rv0060	39 kDa	4	2	5	1
568	Rv0505c_serB1	40 kDa	1	3	6	4
569	Rv0953c_Rv0953c	31 kDa	3	2	5	5
570	Rv1235_lpqY	50 kDa	2	1	4	7
571	Rv1266c_pknH	67 kDa	1	0	4	8
572	Rv1409_ribG	35 kDa	2	5	5	3
573	Rv1458c_Rv1458c	34 kDa	1	3	3	7
574	Rv1481_Rv1481	36 kDa	0	0	3	8
575	Rv1633_uvrB	78 kDa	0	11	0	3
576	Rv2061c_Rv2061c	15 kDa	1	2	3	2
577	Rv2908c_Rv2908c	9 kDa	2	2	3	2
578	Rv2930_fadD26	63 kDa	0	11	0	7
579	Rv3050c_Rv3050c	28 kDa	2	0	8	2
580	Rv3232c_ppk2	34 kDa	7	2	5	0
581	Rv3480c_Rv3480c	53 kDa	4	3	1	1
582	Rv3493c_Rv3493c	26 kDa	0	0	4	6
583	Rv3633_Rv3633	32 kDa	1	8	0	5
584	Rv3802c_Rv3802c	35 kDa	1	1	2	4
585	Rv0172_mce1D	56 kDa	0	2	4	6
586	Rv0174_mce1F	54 kDa	0	2	2	6
587	Rv0332_Rv0332	29 kDa	0	5	2	4
588	Rv0404_fadD30	64 kDa	0	7	2	5
589	Rv3915_Rv3915	44 kDa	0	7	0	4
590	Rv0202c_mmpL11	104 kDa	2	1	4	4
591	Rv0342_iniA	70 kDa	0	9	1	2
592	Rv0450c_mmpL4	105 kDa	0	1	2	6
593	Rv0713_Rv0713	34 kDa	2	2	1	5
594	Rv1095_phoH2	47 kDa	0	3	1	3
595	Rv1327c_glgE	79 kDa	3	3	1	4
596	Rv2609c_Rv2609c	38 kDa	3	0	4	2
597	Rv2718c_nrdR	17 kDa	4	6	2	1
598	Rv2873_mpt83	22 kDa	1	4	2	5
599	Rv3368c_Rv3368c	24 kDa	6	0	8	1
600	Rv3804c_fbpA	36 kDa	1	1	5	1
601	Rv3850_Rv3850	24 kDa	1	0	2	5
602	Rv0018c_pstP	54 kDa	1	0	2	2
603	Rv0046c_ino1	40 kDa	1	1	4	4
604	Rv0050_ponA1	71 kDa	0	0	4	6
605	Rv0497_Rv0497	33 kDa	1	1	5	5
606	Rv0564c_gpdA1	36 kDa	4	2	1	5
607	Rv1293_lysA	47 kDa	5	3	2	2
608	Rv1411c_lprG	25 kDa	1	3	2	2
609	Rv1923_lipD	47 kDa	1	4	3	2
610	Rv2113_Rv2113	42 kDa	2	1	2	5
611	Rv2155c_murD	49 kDa	1	3	2	3
612	Rv2720_lexA	25 kDa	1	2	4	2
613	Rv3215_entC	39 kDa	2	3	3	1
614	Rv3264c_manB	38 kDa	1	4	1	3
615	Rv3495c_lprN	41 kDa	2	3	2	6
616	Rv3761c_fadE36	39 kDa	0	5	0	4
617	Rv1489_Rv1489	12 kDa	1	1	0	4
618	Rv0171_mce1C	54 kDa	3	0	4	3
619	Rv0177_Rv0177	20 kDa	1	1	2	3
620	Rv1082_mca	33 kDa	0	8	0	4
621	Rv1118c_Rv1118c	32 kDa	3	1	3	2
622	Rv1183_mmpL10	106 kDa	2	0	4	3
623	Rv1443c_Rv1443c	18 kDa	2	3	4	3
624	Rv1516c_Rv1516c	38 kDa	0	2	1	4
625	Rv2242_Rv2242	45 kDa	0	5	0	2
626	Rv2394_ggtB	67 kDa	1	0	3	6
627	Rv2673_aftC	49 kDa	1	2	3	5
628	Rv2778c_Rv2778c	17 kDa	0	3	2	2
629	Rv3080c_pknK	119 kDa	0	10	0	5
630	Rv3150_nuoF	48 kDa	1	1	7	3
631	Rv3173c_Rv3173c	22 kDa	2	0	1	1
632	Rv3547_ddn	17 kDa	2	4	2	3
633	Rv0175_Rv0175	22 kDa	0	2	3	6
634	Rv3852_hns	14 kDa	1	1	3	5
635	Rv0568_cyp135B1	51 kDa	2	2	3	3
636	Rv0583c_lpqN	24 kDa	2	1	4	3
637	Rv1275_lprC	19 kDa	2	1	4	1
638	Rv2258c_Rv2258c	38 kDa	0	8	0	6
639	Rv2468c_Rv2468c	17 kDa	1	3	4	3
640	Rv2782c_pepR	47 kDa	1	1	3	0
641	Rv2824c_Rv2824c	34 kDa	1	0	4	1
642	Rv3071_Rv3071	40 kDa	1	0	2	4
643	Rv3083_Rv3083	55 kDa	0	3	2	3
644	Rv3197_Rv3197	49 kDa	1	5	1	1
645	Rv3220c_Rv3220c	54 kDa	0	9	1	1
646	Rv3842c_glpQ1	30 kDa	2	4	1	1
647	Rv0053_rpsF	11 kDa	0	0	3	1
648	Rv0169_mce1A	48 kDa	2	2	2	3
649	Rv0513_Rv0513	19 kDa	1	2	4	3
650	Rv0700_rpsJ	11 kDa	2	1	2	1
651	Rv1022_lpqU	26 kDa	1	1	1	4
652	Rv1098c_fum	50 kDa	0	7	0	9
653	Rv1420_uvrC	72 kDa	2	0	5	1
654	Rv1421_Rv1421	33 kDa	1	5	2	3
655	Rv1446c_opcA	33 kDa	1	9	1	3
656	Rv1713_engA	50 kDa	2	1	5	0
657	Rv1854c_ndh	50 kDa	1	2	3	11
658	Rv2124c_metH	130 kDa	0	1	6	3
659	Rv3152_nuoH	45 kDa	3	2	3	3
660	Rv3228_Rv3228	35 kDa	1	4	5	3
661	Rv3245c_mtrB	62 kDa	0	0	0	3
662	Rv3280_accD5	59 kDa	2	2	3	0
663	Rv3691_Rv3691	35 kDa	0	2	1	6
664	Rv0007_Rv0007	31 kDa	1	2	1	4
665	Rv1886c_fbpB	35 kDa	3	4	2	3
666	Rv0144_Rv0144	31 kDa	0	2	4	3
667	Rv0199_Rv0199	24 kDa	1	2	2	4
668	Rv0251c_hsp	18 kDa	0	6	0	5
669	Rv0633c_Rv0633c	32 kDa	0	0	3	4
670	Rv0761c_adhB	40 kDa	5	1	3	0
671	Rv0982_mprB	54 kDa	0	2	3	3
672	Rv1426c_lipO	46 kDa	0	1	1	6
673	Rv1436_gap	36 kDa	2	1	2	1
674	Rv1448c_tal	41 kDa	0	6	0	6
675	Rv1856c_Rv1856c	23 kDa	0	5	0	6
676	Rv2001_Rv2001	29 kDa	3	2	5	2
677	Rv2467_pepN	94 kDa	1	3	3	4
678	Rv2740_ephG	17 kDa	1	3	2	2
679	Rv3244c_lpqB	61 kDa	1	0	2	2
680	Rv3492c_Rv3492c	18 kDa	1	0	2	2
681	Rv3651_Rv3651	38 kDa	0	1	7	2
682	Rv3597c_lsr2	12 kDa	2	3	2	3
683	Rv0473_Rv0473	51 kDa	0	1	0	4
684	Rv0503c_cmaA2	35 kDa	0	8	0	5
685	Rv0639_nusG	25 kDa	1	6	1	5
686	Rv0654_Rv0654	55 kDa	2	3	2	2
687	Rv0681_Rv0681	21 kDa	2	3	5	1
688	Rv0820_phoT	28 kDa	2	3	2	3
689	Rv1387_PPE20	55 kDa	1	2	1	2
690	Rv2028c_Rv2028c	29 kDa	0	7	0	4
691	Rv2112c_dop	60 kDa	0	8	0	2
692	Rv2216_Rv2216	32 kDa	0	3	2	2
693	Rv2397c_cysA1	37 kDa	3	1	4	1
694	Rv2536_Rv2536	25 kDa	2	2	2	3
695	Rv2539c_aroK	19 kDa	2	0	3	1
696	Rv2959c_Rv2959c	28 kDa	1	2	3	3
697	Rv2962c_Rv2962c	49 kDa	2	2	4	2
698	Rv2981c_ddlA	40 kDa	0	4	0	3
699	Rv3028c_fixB	32 kDa	1	1	1	4
700	Rv3568c_hsaC	34 kDa	1	3	5	6
701	Rv0928_pstS3	38 kDa	1	2	1	2
702	Rv3158_nuoN	55 kDa	2	2	0	2
703	Rv0043c_Rv0043c	27 kDa	5	0	4	0
704	Rv0136_cyp138	49 kDa	0	0	1	4
705	Rv0184_Rv0184	27 kDa	0	5	1	2
706	Rv0431_Rv0431	17 kDa	1	1	1	3
707	Rv0806c_cpsY	60 kDa	0	0	3	2
708	Rv0885_Rv0885	40 kDa	0	4	0	7
709	Rv0905_echA6	26 kDa	0	5	0	4
710	Rv1131_prpC	43 kDa	0	9	0	4
711	Rv1261c_Rv1261c	17 kDa	1	4	2	2
712	Rv1276c_Rv1276c	16 kDa	2	1	6	2
713	Rv1523_Rv1523	38 kDa	0	5	1	2
714	Rv1612_trpB	43 kDa	2	1	2	3
715	Rv1695_ppnK	33 kDa	0	3	0	2
716	Rv1736c_narX	73 kDa	0	6	0	3
717	Rv2157c_murF	52 kDa	0	3	1	4
718	Rv2285_Rv2285	48 kDa	1	4	0	4
719	Rv2291_sseB	29 kDa	0	9	0	4
720	Rv2588c_yajC	13 kDa	1	0	3	4
721	Rv2672_Rv2672	54 kDa	0	0	2	3
722	Rv3218_Rv3218	34 kDa	0	3	0	4
723	Rv3330_dacB1	42 kDa	0	0	9	5
724	Rv3502c_Rv3502c	33 kDa	0	7	0	5
725	Rv3609c_folE	22 kDa	3	1	3	1
726	Rv3814c_Rv3814c	29 kDa	0	3	0	0
727	Rv3885c_eccE2	58 kDa	1	1	2	6
728	Rv0379_secE2	8 kDa	2	0	3	1
729	Rv3669_Rv3669	19 kDa	1	1	2	2
730	Rv0117_oxyS	34 kDa	0	6	0	3
731	Rv0139_Rv0139	37 kDa	0	5	0	3
732	Rv0496_Rv0496	35 kDa	1	1	2	3
733	Rv0669c_Rv0669c	69 kDa	1	1	3	1
734	Rv0688_Rv0688	43 kDa	0	7	0	4
735	Rv0986_Rv0986	27 kDa	1	1	2	4
736	Rv1069c_Rv1069c	64 kDa	0	1	0	4
737	Rv1185c_fadD21	63 kDa	0	7	1	4
738	Rv1407_fmu	48 kDa	1	0	1	1
739	Rv1447c_zwf2	57 kDa	0	6	1	4
740	Rv1746_pknF	51 kDa	0	2	1	5
741	Rv1852_ureG	23 kDa	1	1	2	2
742	Rv1920_Rv1920	32 kDa	1	3	2	2
743	Rv2062c_cobN	129 kDa	3	2	2	2
744	Rv2947c_pks15	52 kDa	1	6	2	2
745	Rv3084_lipR	33 kDa	1	1	2	5
746	Rv3224_Rv3224	30 kDa	1	1	8	0
747	Rv3254_Rv3254	52 kDa	1	3	3	1
748	Rv3464_rmlB	38 kDa	2	4	0	3
749	Rv2518c_ldtB	43 kDa	0	2	2	3
750	Rv3153_nuoI	23 kDa	2	2	2	2
751	Rv2182c_Rv2182c	27 kDa	0	2	1	2
752	Rv3041c_Rv3041c	31 kDa	2	2	2	2
753	Rv0008c_Rv0008c	16 kDa	0	0	2	3
754	Rv0009_ppiA	19 kDa	0	6	1	3
755	Rv0249c_Rv0249c	31 kDa	1	0	3	1
756	Rv0337c_aspC	47 kDa	0	4	0	3
757	Rv0646c_lipG	33 kDa	0	5	1	3
758	Rv0758_phoR	52 kDa	1	1	5	1
759	Rv1018c_glmU	52 kDa	0	4	3	2
760	Rv1097c_Rv1097c	30 kDa	0	1	3	5
761	Rv1245c_Rv1245c	29 kDa	0	2	1	5
762	Rv1259_udgB	32 kDa	0	2	1	3
763	Rv1598c_Rv1598c	15 kDa	1	1	3	2
764	Rv1738_Rv1738	11 kDa	0	4	0	4
765	Rv1823_Rv1823	32 kDa	0	0	3	3
766	Rv1899c_lppD	35 kDa	1	4	2	1
767	Rv1900c_lipJ	50 kDa	0	4	0	3
768	Rv1901_cinA	46 kDa	0	7	0	3
769	Rv1912c_fadB5	36 kDa	1	3	0	3
770	Rv1977_Rv1977	38 kDa	0	1	2	5
771	Rv2391_sirA	63 kDa	1	0	8	0
772	Rv2404c_lepA	72 kDa	2	2	5	0
773	Rv2426c_Rv2426c	32 kDa	1	2	1	2
774	Rv2597_Rv2597	22 kDa	0	2	3	3
775	Rv2690c_Rv2690c	71 kDa	1	2	2	4
776	Rv2702_ppgK	27 kDa	2	2	2	2
777	Rv2732c_Rv2732c	22 kDa	2	1	3	2
778	Rv3208_Rv3208	25 kDa	0	6	0	3
779	Rv3272_Rv3272	42 kDa	3	1	7	0
780	Rv3841_bfrB	20 kDa	0	5	0	2
781	Rv3866_espG1	30 kDa	0	5	0	2
782	Rv1865c_Rv1865c	30 kDa	1	3	1	1
783	Rv2739c_Rv2739c	40 kDa	0	3	2	2
784	Rv3614c_espD	20 kDa	1	2	3	2
785	Rv2991_Rv2991	18 kDa	1	2	2	2
786	Rv2166c_Rv2166c	16 kDa	0	1	2	2
787	Rv0187_Rv0187	23 kDa	1	1	2	0
788	Rv0262c_aac	20 kDa	2	2	3	0
789	Rv0312_Rv0312	64 kDa	3	2	2	1
790	Rv0435c_Rv0435c	75 kDa	0	4	0	3
791	Rv0780_purC	33 kDa	0	3	0	2
792	Rv1130_prpD	58 kDa	0	7	0	3
793	Rv1320c_Rv1320c	62 kDa	1	0	2	3
794	Rv1410c_Rv1410c	55 kDa	2	0	4	2
795	Rv1882c_Rv1882c	30 kDa	1	2	3	3
796	Rv2622_Rv2622	30 kDa	3	1	3	3
797	Rv3602c_panC	33 kDa	0	5	0	3
798	Rv3864_espE	42 kDa	0	3	0	3
799	Rv1193_fadD36	49 kDa	0	3	0	2
800	Rv2889c_tsf	29 kDa	1	2	1	1
801	Rv1462_Rv1462	43 kDa	2	1	2	1
802	Rv0864_moaC2	18 kDa	2	0	3	0
803	Rv1010_ksgA	35 kDa	1	2	2	1
804	Rv1304_atpB	27 kDa	1	2	2	2
805	Rv0045c_Rv0045c	32 kDa	0	5	0	2
806	Rv0123_Rv0123	14 kDa	0	2	2	2
807	Rv0558_menH	25 kDa	1	0	4	1
808	Rv0772_purD	43 kDa	0	5	0	5
809	Rv1021_Rv1021	35 kDa	0	5	0	3
810	Rv1063c_Rv1063c	38 kDa	0	8	0	1
811	Rv1096_Rv1096	31 kDa	1	3	1	5
812	Rv1141c_echA11	28 kDa	0	6	0	3
813	Rv1484_inhA	29 kDa	1	5	0	2
814	Rv2263_Rv2263	34 kDa	0	1	3	3
815	Rv2368c_phoH1	38 kDa	0	1	1	1
816	Rv2400c_subI	37 kDa	0	1	3	3
817	Rv2572c_aspS	65 kDa	0	5	0	6
818	Rv2611c_Rv2611c	35 kDa	0	1	2	4
819	Rv2948c_fadD22	75 kDa	0	7	0	1
820	Rv3149_nuoE	27 kDa	1	0	4	0
821	Rv3154_nuoJ	28 kDa	2	1	2	4
822	Rv3265c_wbbL1	33 kDa	0	0	2	1
823	Rv3301c_phoY1	25 kDa	0	5	0	2
824	Rv3497c_mce4C	38 kDa	0	0	1	5
825	Rv3586_Rv3586	39 kDa	0	6	0	2
826	Rv3732_Rv3732	38 kDa	2	0	3	2
827	Rv3918c_parA	38 kDa	1	4	0	3
828	Rv0737_Rv0737	18 kDa	2	0	4	0
829	Rv1201c_dapD	33 kDa	0	2	2	1
830	Rv3882c_eccE1	50 kDa	1	1	0	4
831	Rv2538c_aroB	38 kDa	0	2	1	3
832	Rv2047c_Rv2047c	91 kDa	1	1	1	2
833	Rv1636_TB15.3	15 kDa	1	1	2	1
834	Rv0308_Rv0308	26 kDa	1	1	3	1
835	Rv0502_Rv0502	39 kDa	2	2	2	1
836	Rv2145c_wag31	28 kDa	2	2	1	2
837	Rv1963c_mce3R	44 kDa	1	2	2	1
838	Rv0415_thiO	37 kDa	2	2	2	2
839	Rv1475c_acn	102 kDa	1	2	1	1
840	Rv0637_hadC	19 kDa	1	2	2	1
841	Rv0103c_ctpB	77 kDa	0	1	1	2
842	Rv0092_ctpA	79 kDa	0	1	2	3
843	Rv0271c_fadE6	78 kDa	0	7	0	3
844	Rv0938_ligD	84 kDa	0	0	4	0
845	Rv0955_Rv0955	46 kDa	0	0	4	7
846	Rv1165_typA	68 kDa	0	5	0	1
847	Rv1285_cysD	38 kDa	0	6	0	1
848	Rv1315_murA	44 kDa	0	4	0	3
849	Rv1427c_fadD12	58 kDa	0	4	0	5
850	Rv1595_nadB	54 kDa	1	2	1	0
851	Rv1737c_narK2	41 kDa	0	2	0	3
852	Rv2000_Rv2000	60 kDa	0	4	0	3
853	Rv2500c_fadE19	42 kDa	0	4	1	2
854	Rv2676c_Rv2676c	26 kDa	1	2	0	0
855	Rv2849c_cobO	23 kDa	2	0	4	0
856	Rv2850c_Rv2850c	67 kDa	1	4	1	1
857	Rv2862c_Rv2862c	21 kDa	0	0	4	1
858	Rv3274c_fadE25	42 kDa	0	3	0	4
859	Rv3298c_lpqC	31 kDa	1	1	3	2
860	Rv3782_glfT1	34 kDa	0	1	1	3
861	Rv3805c_aftB	69 kDa	1	0	3	0
862	Rv0003_recF	42 kDa	3	2	1	0
863	Rv1178_Rv1178	38 kDa	3	3	2	0
864	Rv3295_Rv3295	25 kDa	0	2	1	3
865	Rv3779_Rv3779	72 kDa	0	1	1	3
866	Rv2496c_bkdB	38 kDa	0	2	1	0
867	Rv0993_galU	32 kDa	0	2	1	1
868	Rv3806c_ubiA	33 kDa	1	0	3	1
869	Rv3895c_eccB2	52 kDa	1	1	1	2
870	Rv1571_Rv1571	18 kDa	1	1	2	1
871	Rv3459c_rpsK	15 kDa	2	0	2	0
872	Rv3462c_infA	8 kDa	2	1	2	1
873	Rv3695_Rv3695	33 kDa	1	1	1	3
874	Rv0682_rpsL	14 kDa	1	1	1	1
875	Rv0020c_fhaA	57 kDa	2	0	2	4
876	Rv0167_yrbE1A	28 kDa	0	1	1	3
877	Rv0361_Rv0361	30 kDa	0	0	1	3
878	Rv0400c_fadE7	42 kDa	4	0	0	0
879	Rv0696_Rv0696	51 kDa	0	1	0	5
880	Rv1586c_Rv1586c	52 kDa	2	0	3	0
881	Rv2161c_Rv2161c	31 kDa	0	5	0	2
882	Rv2566_Rv2566	125 kDa	0	1	0	5
883	Rv2700_Rv2700	23 kDa	0	2	1	3
884	Rv2715_Rv2715	37 kDa	0	2	1	2
885	Rv2852c_mqo	54 kDa	1	1	3	1
886	Rv3075c_Rv3075c	33 kDa	0	3	0	2
887	Rv3482c_Rv3482c	29 kDa	0	0	2	2
888	Rv3582c_ispD	24 kDa	0	3	0	0
889	Rv3644c_Rv3644c	42 kDa	1	4	1	1
890	Rv3645_Rv3645	59 kDa	0	1	0	3
891	Rv1591_Rv1591	23 kDa	0	1	1	2
892	Rv0211_pckA	67 kDa	0	2	0	3
893	Rv2410c_Rv2410c	36 kDa	0	3	0	1
894	Rv3143_Rv3143	14 kDa	1	1	1	1
895	Rv2148c_Rv2148c	28 kDa	2	1	2	1
896	Rv3435c_Rv3435c	31 kDa	1	1	0	1
897	Rv1263_amiB2	49 kDa	1	0	2	1
898	Rv0129c_fbpC	37 kDa	0	2	1	2
899	Rv3718c_Rv3718c	16 kDa	1	1	2	1
900	Rv0112_gca	35 kDa	0	2	0	0
901	Rv0146_Rv0146	34 kDa	1	6	0	0
902	Rv0343_iniC	53 kDa	0	3	0	1
903	Rv0363c_fba	37 kDa	1	0	8	0
904	Rv0407_fgd1	37 kDa	0	3	0	2
905	Rv1496_Rv1496	36 kDa	0	0	2	0
906	Rv2140c_TB18.6	19 kDa	2	0	2	0
907	Rv2392_cysH	27 kDa	0	4	0	3
908	Rv2510c_Rv2510c	57 kDa	0	5	0	1
909	Rv2691_ceoB	24 kDa	2	2	3	1
910	Rv3040c_Rv3040c	31 kDa	0	4	0	5
911	Rv3049c_Rv3049c	59 kDa	0	3	0	2
912	Rv3579c_Rv3579c	34 kDa	0	0	0	1
913	Rv3624c_hpt	24 kDa	0	4	0	1
914	Rv1589_bioB	38 kDa	0	3	0	3
915	Rv1625c_cya	47 kDa	0	0	2	2
916	Rv3758c_proV	40 kDa	0	0	2	2
917	Rv1108c_xseA	45 kDa	0	2	1	0
918	Rv3210c_Rv3210c	25 kDa	0	2	0	2
919	Rv0561c_Rv0561c	44 kDa	2	0	2	0
920	Rv1429_Rv1429	47 kDa	0	3	0	2
921	Rv3792_aftA	70 kDa	0	0	2	1
922	Rv0635_hadA	17 kDa	1	2	1	2
923	Rv1100_Rv1100	25 kDa	0	0	3	2
924	Rv0411c_glnH	35 kDa	0	0	2	1
925	Rv2412_rpsT	9 kDa	1	1	1	1
926	Rv2988c_leuC	50 kDa	1	2	0	2
927	Rv0038_Rv0038	22 kDa	1	2	1	0
928	Rv0538_Rv0538	55 kDa	1	0	2	2
929	Rv0382c_pyrE	19 kDa	1	0	1	0
930	Rv1084_Rv1084	71 kDa	0	2	0	1
931	Rv0080_Rv0080	17 kDa	0	3	0	1
932	Rv0525_Rv0525	22 kDa	0	4	1	2
933	Rv0862c_Rv0862c	80 kDa	1	4	0	0
934	Rv0906_Rv0906	41 kDa	0	2	1	2
935	Rv1109c_Rv1109c	23 kDa	0	1	1	4
936	Rv1251c_Rv1251c	123 kDa	2	0	1	0
937	Rv1278_Rv1278	93 kDa	1	1	2	0
938	Rv1463_Rv1463	29 kDa	0	3	0	2
939	Rv1473_Rv1473	58 kDa	1	3	1	0
940	Rv1661_pks7	221 kDa	0	1	4	3
941	Rv2164c_Rv2164c	40 kDa	0	0	0	2
942	Rv2287_yjcE	57 kDa	0	0	1	2
943	Rv2405_Rv2405	21 kDa	3	1	3	0
944	Rv2571c_Rv2571c	37 kDa	0	0	1	3
945	Rv2971_Rv2971	30 kDa	0	1	0	1
946	Rv3305c_amiA1	41 kDa	0	3	0	3
947	Rv3767c_Rv3767c	35 kDa	1	9	0	0
948	Rv3818_Rv3818	58 kDa	0	4	0	1
949	Rv0563_htpX	31 kDa	1	0	1	1
950	Rv1498c_Rv1498c	23 kDa	0	3	1	2
951	Rv1701_Rv1701	34 kDa	1	2	0	0
952	Rv1812c_Rv1812c	42 kDa	1	5	0	1
953	Rv2102_Rv2102	26 kDa	2	1	0	0
954	Rv2121c_hisG	30 kDa	0	0	1	0
955	Rv3554_fdxB	77 kDa	0	1	0	2
956	Rv3849_espR	15 kDa	0	2	0	2
957	Rv2252_Rv2252	33 kDa	0	1	3	2
958	Rv2913c_Rv2913c	67 kDa	0	2	0	3
959	Rv3708c_asd	36 kDa	0	2	2	2
960	Rv0428c_Rv0428c	33 kDa	1	3	0	0
961	Rv0365c_Rv0365c	42 kDa	2	0	0	2
962	Rv2172c_Rv2172c	33 kDa	0	2	0	2
963	Rv2949c_Rv2949c	23 kDa	1	2	1	1
964	Rv0059_Rv0059	26 kDa	1	1	3	0
965	Rv0073_Rv0073	36 kDa	1	1	1	2
966	Rv0358_Rv0358	23 kDa	0	1	1	2
967	Rv1072_Rv1072	29 kDa	0	0	1	2
968	Rv1111c_Rv1111c	37 kDa	0	0	0	1
969	Rv2831_echA16	27 kDa	2	0	2	0
970	Rv2846c_efpA	56 kDa	1	0	2	1
971	Rv2999_lppY	34 kDa	1	0	2	0
972	Rv3136_PPE51	38 kDa	0	3	0	1
973	Rv0526_Rv0526	23 kDa	1	0	2	2
974	Rv0419_lpqM	53 kDa	1	0	1	1
975	Rv2134c_Rv2134c	21 kDa	1	1	1	0
976	Rv1383_carA	40 kDa	1	2	1	0
977	Rv0255c_cobQ1	52 kDa	0	4	0	0
978	Rv0676c_mmpL5	105 kDa	0	0	0	3
979	Rv0908_ctpE	85 kDa	0	0	0	3
980	Rv1317c_alkA	54 kDa	0	1	1	0
981	Rv1422_Rv1422	36 kDa	0	3	1	1
982	Rv1652_argC	36 kDa	1	0	4	0
983	Rv2861c_mapB	31 kDa	0	3	0	1
984	Rv3092c_Rv3092c	32 kDa	0	0	1	2
985	Rv3137_Rv3137	28 kDa	0	3	0	1
986	Rv3168_Rv3168	43 kDa	0	4	0	1
987	Rv3856c_Rv3856c	37 kDa	0	0	4	1
988	Rv0077c_Rv0077c	30 kDa	0	0	1	3
989	Rv1626_Rv1626	23 kDa	0	2	0	1
990	Rv1796_mycP5	60 kDa	0	0	1	1
991	Rv3886c_mycP2	56 kDa	0	0	1	3
992	Rv3389c_htdY	30 kDa	0	4	0	2
993	Rv0901_Rv0901	19 kDa	0	0	1	2
994	Rv3057c_Rv3057c	31 kDa	0	1	0	2
995	Rv2710_sigB	36 kDa	0	1	2	3
996	Rv3164c_moxR3	35 kDa	1	2	0	2
997	Rv0426c_Rv0426c	14 kDa	0	0	0	3
998	Rv1283c_oppB	35 kDa	0	0	3	1
999	Rv1328_glgP	95 kDa	2	1	1	0
1000	Rv1532c_Rv1532c	16 kDa	1	1	2	0
1001	Rv1707_Rv1707	51 kDa	0	0	1	2
1002	Rv2506_Rv2506	23 kDa	1	1	1	1
1003	Rv2626c_hrp1	16 kDa	0	2	0	2
1004	Rv2976c_ung	24 kDa	2	1	0	1
1005	Rv3156_nuoL	66 kDa	1	0	2	1
1006	Rv3225c_Rv3225c	51 kDa	0	2	1	0
1007	Rv3269_Rv3269	10 kDa	1	1	1	2
1008	Rv3485c_Rv3485c	33 kDa	1	0	0	0
1009	Rv3487c_lipF	29 kDa	1	2	0	0
1010	Rv2041c_Rv2041c	48 kDa	1	0	1	2
1011	Rv2173_idsA2	38 kDa	0	2	0	1
1012	Rv3281_accE5	19 kDa	0	1	0	2
1013	Rv3087_Rv3087	53 kDa	0	1	1	2
1014	Rv1140_Rv1140	30 kDa	1	1	2	1
1015	Rv3499c_mce4A	42 kDa	0	0	1	2
1016	Rv0425c_ctpH	160 kDa	0	0	0	2
1017	Rv1249c_Rv1249c	28 kDa	0	0	0	2
1018	Rv1338_murI	29 kDa	0	4	0	0
1019	Rv1431_Rv1431	65 kDa	1	0	0	1
1020	Rv2190c_Rv2190c	40 kDa	0	0	3	1
1021	Rv2206_Rv2206	26 kDa	0	0	0	3
1022	Rv2772c_Rv2772c	17 kDa	0	0	2	0
1023	Rv2950c_fadD29	67 kDa	0	4	0	1
1024	Rv3146_nuoB	20 kDa	0	1	3	1
1025	Rv3292_Rv3292	45 kDa	0	4	0	0
1026	Rv0208c_Rv0208c	29 kDa	3	0	3	0
1027	Rv0281_Rv0281	33 kDa	0	3	0	2
1028	Rv0988_Rv0988	43 kDa	0	0	1	2
1029	Rv1404_Rv1404	18 kDa	0	3	0	1
1030	Rv2592c_ruvB	37 kDa	0	2	0	0
1031	Rv2724c_fadE20	43 kDa	0	4	0	1
1032	Rv3229c_desA3	48 kDa	0	0	0	2
1033	Rv3257c_pmmA	49 kDa	0	3	1	1
1034	Rv1014c_pth	20 kDa	0	1	3	0
1035	Rv3494c_mce4F	60 kDa	0	0	0	2
1036	Rv3045_adhC	37 kDa	0	1	0	0
1037	Rv2235_Rv2235	30 kDa	0	0	1	3
1038	Rv0394c_Rv0394c	25 kDa	0	1	0	1
1039	Rv2411c_Rv2411c	61 kDa	0	2	0	2
1040	Rv0091_mtn	27 kDa	0	2	0	1
1041	Rv2521_bcp	17 kDa	0	1	2	0
1042	Rv1384_carB	119 kDa	0	2	0	0
1043	Rv0295c_Rv0295c	30 kDa	0	2	0	0
1044	Rv2387_Rv2387	45 kDa	0	0	0	2
1045	Rv0011c_Rv0011c	10 kDa	0	0	1	2
1046	Rv0923c_Rv0923c	39 kDa	1	1	1	0
1047	Rv0987_Rv0987	94 kDa	0	0	0	2
1048	Rv1124_ephC	35 kDa	0	1	2	1
1049	Rv1762c_Rv1762c	29 kDa	0	2	1	1
1050	Rv2042c_Rv2042c	29 kDa	1	1	0	1
1051	Rv2088_pknJ	62 kDa	0	2	1	2
1052	Rv2171_lppM	24 kDa	0	1	1	2
1053	Rv2554c_Rv2554c	18 kDa	0	0	3	1
1054	Rv2893_Rv2893	35 kDa	1	1	2	0
1055	Rv3093c_Rv3093c	35 kDa	1	1	0	0
1056	Rv0803_purL	79 kDa	0	1	0	1
1057	Rv1437_pgk	43 kDa	1	2	0	1
1058	Rv0364_Rv0364	24 kDa	0	0	0	0
1059	Rv0979A_rpmF	7 kDa	0	2	0	0
1060	Rv0307c_Rv0307c	17 kDa	1	1	2	0
1061	Rv3230c_Rv3230c	41 kDa	0	1	0	1
1062	Rv3059_cyp136	56 kDa	0	1	0	0
1063	Rv0636_hadB	15 kDa	0	2	2	0
1064	Rv0166_fadD5	60 kDa	0	4	0	1
1065	Rv0182c_sigG	41 kDa	0	3	0	1
1066	Rv0984_moaB2	18 kDa	1	3	1	1
1067	Rv1112_Rv1112	38 kDa	0	2	0	3
1068	Rv1382_Rv1382	18 kDa	1	0	2	0
1069	Rv2110c_prcB	30 kDa	0	0	4	0
1070	Rv2413c_Rv2413c	33 kDa	0	3	0	2
1071	Rv3723_Rv3723	27 kDa	0	0	0	2
1072	Rv0289_espG3	32 kDa	0	3	0	0
1073	Rv2243_fabD	31 kDa	0	3	1	0
1074	Rv2569c_Rv2569c	34 kDa	0	3	0	3
1075	Rv3626c_Rv3626c	38 kDa	0	0	0	2
1076	Rv3860_Rv3860	42 kDa	0	3	0	1
1077	Rv3838c_pheA	34 kDa	0	3	0	2
1078	Rv1132_Rv1132	64 kDa	0	0	1	0
1079	Rv0941c_Rv0941c	27 kDa	1	0	0	0
1080	Rv1442_bisC	83 kDa	0	2	1	0
1081	Rv1927_Rv1927	29 kDa	0	0	1	0
1082	Rv2743c_Rv2743c	29 kDa	0	0	0	2
1083	Rv0436c_pssA	31 kDa	0	0	0	2
1084	Rv1362c_Rv1362c	23 kDa	0	1	1	2
1085	Rv1534_Rv1534	24 kDa	0	0	2	0
1086	Rv2237_Rv2237	29 kDa	0	1	0	2
1087	Rv3365c_Rv3365c	93 kDa	0	2	1	1
1088	Rv3731_ligC	40 kDa	0	0	1	1
1089	Rv1501_Rv1501	31 kDa	0	2	0	0
1090	Rv2946c_pks1	167 kDa	1	2	0	0
1091	Rv0709_rpmC	9 kDa	0	0	0	0
1092	Rv0954_Rv0954	30 kDa	0	2	1	0
1093	Rv0631c_recC	120 kDa	0	1	0	2
1094	Rv2238c_ahpE	17 kDa	0	2	0	1
1095	Rv2696c_Rv2696c	27 kDa	0	1	0	2
1096	Rv0223c_Rv0223c	51 kDa	0	4	0	0
1097	Rv2228c_Rv2228c	39 kDa	0	4	0	0
1098	Rv2659c_Rv2659c	42 kDa	0	0	0	0
1099	Rv2670c_Rv2670c	40 kDa	0	3	0	0
1100	Rv2870c_dxr	43 kDa	0	3	0	1
1101	Rv3262_fbiB	48 kDa	0	2	0	3
1102	Rv0687_Rv0687	29 kDa	1	3	0	1
1103	Rv2067c_Rv2067c	46 kDa	0	3	0	1
1104	Rv3574_kstR	22 kDa	0	3	0	1
1105	Rv3701c_Rv3701c	35 kDa	0	3	0	1
1106	Rv1576c_Rv1576c	50 kDa	0	2	0	0
1107	Rv1992c_ctpG	79 kDa	0	0	0	3
1108	Rv0013_trpG	25 kDa	0	2	0	1
1109	Rv1830_Rv1830	24 kDa	0	1	0	2
1110	Rv2464c_Rv2464c	30 kDa	0	0	0	0
1111	Rv1333_Rv1333	34 kDa	0	2	0	0
1112	Rv3790_dprE1	50 kDa	0	3	1	1
1113	Rv0222_echA1	27 kDa	0	2	0	0
1114	Rv0238_Rv0238	22 kDa	0	0	1	0
1115	Rv0070c_glyA2	46 kDa	0	1	0	2
1116	Rv0346c_ansP2	52 kDa	1	0	2	0
1117	Rv0490_senX3	45 kDa	0	2	0	2
1118	Rv0542c_menE	37 kDa	0	0	0	0
1119	Rv0996_Rv0996	40 kDa	0	0	0	2
1120	Rv1486c_Rv1486c	30 kDa	0	2	0	0
1121	Rv1596_nadC	30 kDa	1	0	2	0
1122	Rv2174_mptA	55 kDa	0	0	1	1
1123	Rv2441c_rpmA	9 kDa	0	0	0	0
1124	Rv2453c_mobA	21 kDa	0	2	0	1
1125	Rv3401_Rv3401	87 kDa	1	1	0	0
1126	Rv3603c_Rv3603c	31 kDa	0	2	0	1
1127	Rv1008_tatD	29 kDa	1	0	2	0
1128	Rv0153c_ptbB	30 kDa	0	2	0	1
1129	Rv3243c_Rv3243c	31 kDa	1	2	0	0
1130	Rv2366c_Rv2366c	47 kDa	0	0	1	1
1131	Rv1244_lpqZ	30 kDa	0	0	0	2
1132	Rv3141_fadB4	34 kDa	0	2	0	1
1133	Rv1217c_Rv1217c	57 kDa	0	1	0	1
1134	Rv0293c_Rv0293c	44 kDa	0	0	0	1
1135	Rv0421c_Rv0421c	22 kDa	0	0	2	0
1136	Rv3730c_Rv3730c	39 kDa	0	0	0	1
1137	Rv0498_Rv0498	30 kDa	0	1	1	1
1138	Rv2138_lppL	37 kDa	0	0	0	2
1139	Rv3278c_Rv3278c	20 kDa	0	0	0	2
1140	Rv2535c_pepQ	39 kDa	0	0	0	2
1141	Rv1487_Rv1487	15 kDa	0	0	0	1
1142	Rv0694_lldD1	42 kDa	0	2	0	1
1143	Rv2987c_leuD	22 kDa	0	2	0	1
1144	Rv1841c_Rv1841c	37 kDa	0	2	0	1
1145	Rv3843c_Rv3843c	37 kDa	0	0	0	1
1146	Rv0731c_Rv0731c	35 kDa	0	3	0	0
1147	Rv1253_deaD	61 kDa	0	0	0	0
1148	Rv1367c_Rv1367c	41 kDa	0	4	0	0
1149	Rv1345_mbtM	54 kDa	0	3	0	1
1150	Rv0190_Rv0190	10 kDa	0	1	0	1
1151	Rv0220_lipC	44 kDa	2	0	1	0
1152	Rv0389_purT	44 kDa	0	1	0	0
1153	Rv0677c_mmpS5	15 kDa	0	0	2	0
1154	Rv0799c_Rv0799c	36 kDa	0	1	0	0
1155	Rv1086_Rv1086	29 kDa	0	0	0	2
1156	Rv1153c_omt	31 kDa	0	2	0	2
1157	Rv1400c_lipI	34 kDa	0	1	0	2
1158	Rv1511_gmdA	38 kDa	1	0	0	0
1159	Rv2037c_Rv2037c	35 kDa	0	0	0	1
1160	Rv2096c_pafB	35 kDa	0	1	0	2
1161	Rv2130c_mshC	46 kDa	0	0	1	0
1162	Rv2152c_murC	51 kDa	0	2	0	0
1163	Rv2484c_Rv2484c	52 kDa	0	0	0	2
1164	Rv2926c_Rv2926c	22 kDa	0	0	0	1
1165	Rv3520c_Rv3520c	38 kDa	0	0	2	0
1166	Rv3796_Rv3796	39 kDa	0	0	0	1
1167	Rv0951_sucC	41 kDa	2	0	1	0
1168	Rv1060_Rv1060	17 kDa	0	0	2	0
1169	Rv1348_irtA	93 kDa	0	0	0	2
1170	Rv2222c_glnA2	50 kDa	0	1	0	2
1171	Rv3035_Rv3035	37 kDa	0	0	0	2
1172	Rv0567_Rv0567	37 kDa	0	2	0	0
1173	Rv0926c_Rv0926c	38 kDa	0	2	0	1
1174	Rv2840c_Rv2840c	11 kDa	0	0	1	0
1175	Rv3303c_lpdA	51 kDa	0	2	0	0
1176	Rv1415_ribA2	46 kDa	0	2	0	1
1177	Rv2003c_Rv2003c	31 kDa	0	1	0	0
1178	Rv2438c_nadE	75 kDa	0	2	0	1
1179	Rv0019c_fhaB	17 kDa	0	0	0	0
1180	Rv3155_nuoK	11 kDa	0	0	1	1
1181	Rv2477c_Rv2477c	62 kDa	0	2	1	0
1182	Rv3478_PPE60	39 kDa	0	2	1	0
1183	Rv0952_sucD	31 kDa	0	2	1	1
1184	Rv3919c_gid	24 kDa	0	0	0	1
1185	Rv2698_Rv2698	18 kDa	0	0	0	2
1186	Rv1093_glyA1	45 kDa	1	0	0	0
1187	Rv3759c_proX	33 kDa	0	0	2	0
1188	Rv2381c_mbtD	106 kDa	0	3	0	0
1189	Rv0958_Rv0958	50 kDa	0	3	0	0
1190	Rv2050_Rv2050	13 kDa	0	0	0	0
1191	Rv3341_metA	40 kDa	0	2	0	0
1192	Rv2379c_mbtF	157 kDa	0	2	0	0
1193	Rv0553_menC	34 kDa	0	3	0	0
1194	Rv1522c_mmpL12	122 kDa	0	0	0	0
1195	Rv1609_trpE	56 kDa	0	1	0	0
1196	Rv2428_ahpC	22 kDa	0	2	0	0
1197	Rv2606c_snzP	31 kDa	1	2	0	0
1198	Rv2692_ceoC	24 kDa	2	0	1	0
1199	Rv1558_Rv1558	16 kDa	0	2	0	1
1200	Rv3391_acrA1	71 kDa	0	0	0	0
1201	Rv2725c_hflX	53 kDa	0	2	0	0
1202	Rv1894c_Rv1894c	40 kDa	0	2	0	0
1203	Rv2874_dipZ	74 kDa	0	0	0	1
1204	Rv2612c_pgsA1	23 kDa	0	0	1	0
1205	Rv2883c_pyrH	27 kDa	1	0	2	0
1206	Rv3694c_Rv3694c	35 kDa	0	0	1	0
1207	Rv2035_Rv2035	19 kDa	0	3	0	0
1208	Rv1142c_echA10	28 kDa	0	1	0	0
1209	Rv1260_Rv1260	41 kDa	0	2	0	0
1210	Rv3418c_groES	11 kDa	0	0	2	0
1211	Rv0127_mak	50 kDa	0	0	0	0
1212	Rv2540c_aroF	42 kDa	0	2	0	0
1213	Rv2994_Rv2994	47 kDa	0	0	0	2
1214	Rv1301_Rv1301	23 kDa	0	2	0	1
1215	Rv0571c_Rv0571c	47 kDa	0	2	0	1
1216	Rv3600c_Rv3600c	29 kDa	0	2	0	0
1217	Rv2026c_Rv2026c	31 kDa	0	0	0	2
1218	Rv2956_Rv2956	27 kDa	1	0	0	1
1219	Rv0808_purF	56 kDa	0	0	0	0
1220	Rv1647_Rv1647	34 kDa	0	0	0	0
1221	Rv1878_glnA3	47 kDa	0	0	2	0
1222	Rv2090_Rv2090	42 kDa	0	2	0	0
1223	Rv2764c_thyA	30 kDa	0	2	0	0
1224	Rv3227_aroA	46 kDa	0	2	0	0
1225	Rv3553_Rv3553	37 kDa	0	0	0	2
1226	Rv1126c_Rv1126c	22 kDa	0	2	0	0
1227	Rv3377c_Rv3377c	55 kDa	0	0	2	0
1228	Rv3094c_Rv3094c	40 kDa	0	0	0	2
1229	Rv3573c_fadE34	75 kDa	0	2	0	0
1230	Rv0087_hycE	53 kDa	0	0	0	0
1231	Rv2385_mbtJ	33 kDa	0	2	0	0
1232	Rv0817c_Rv0817c	29 kDa	0	0	0	0
1233	Rv1527c_pks5	224 kDa	3	3	2	3
END OF FILE
